# Supplementary figures and images for: Distinct Hypoxia-Related Gene Profiling Characterizes Clinicopathological Features and Immune Status of Mismatch Repair-Deficient Colon Cancer
Source: Hindawi journal article supplement (doi:10.1155/2021/2427427), 2021-12-07

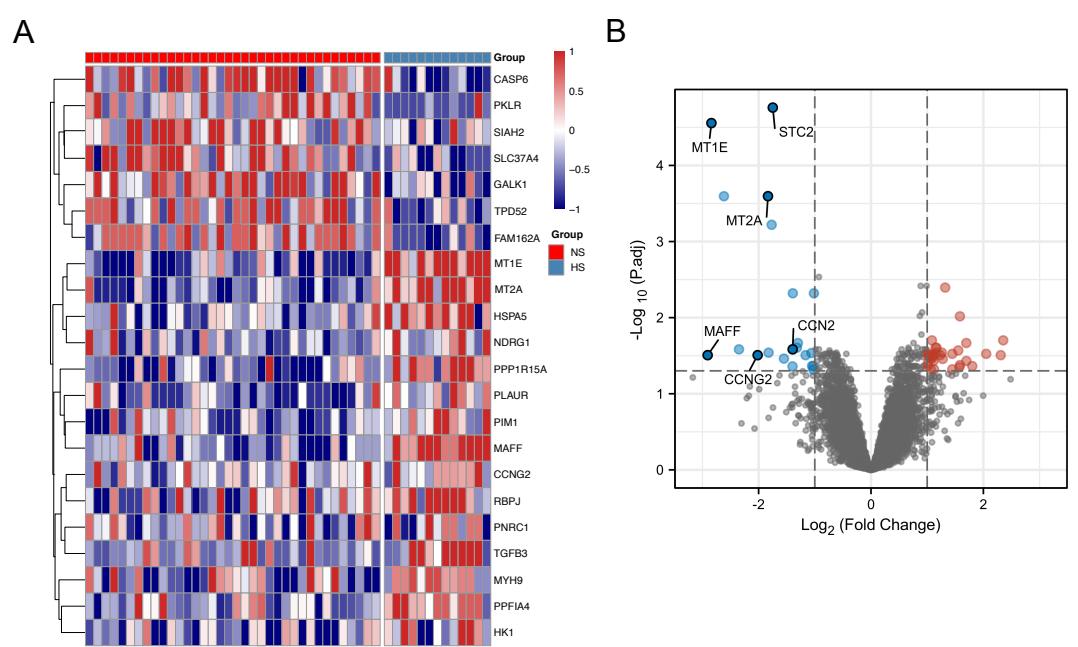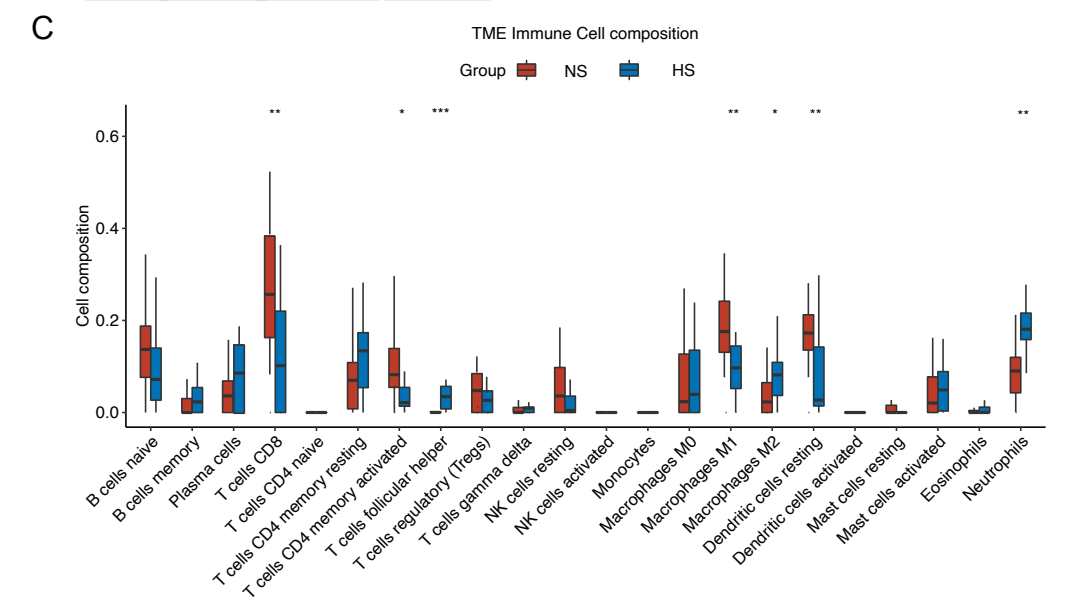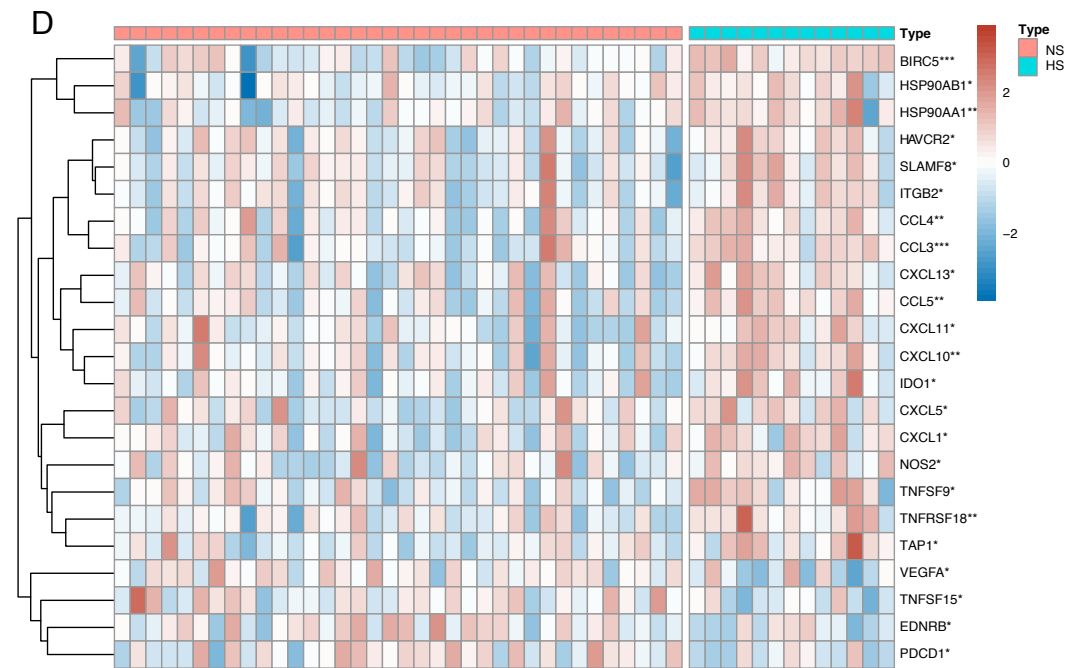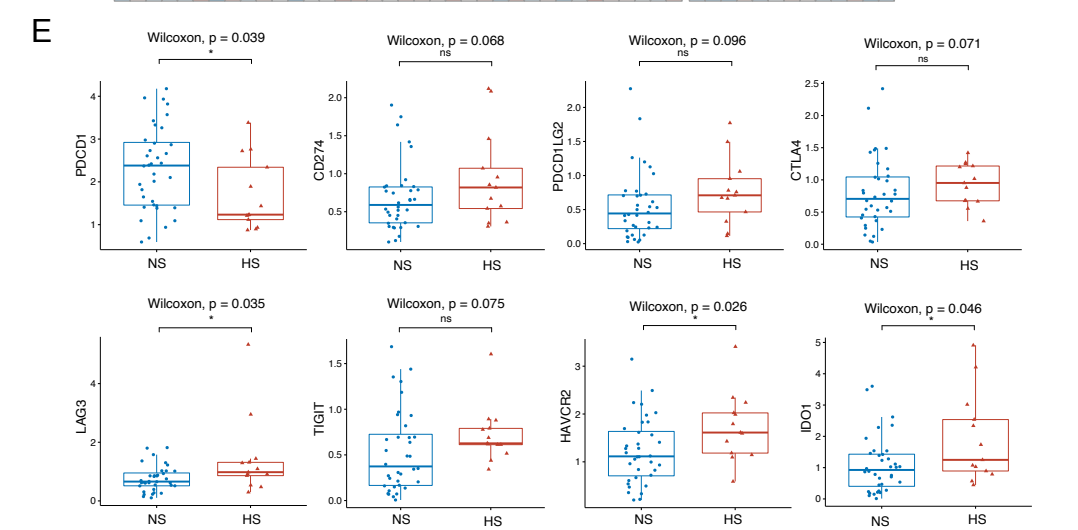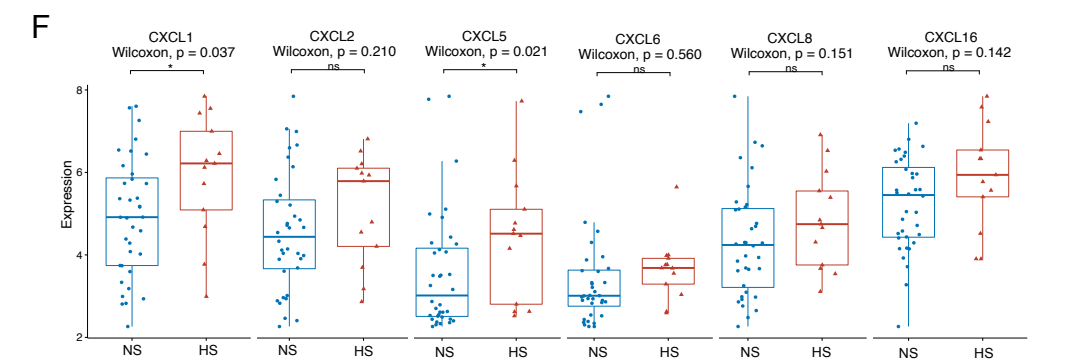

Supplement: f1 [file 2427427.f1.zip]
